# Supplementary material for: Preparation of Ni-microsphere and Cu-MOF using aspartic acid as coordinating ligand and study of their catalytic properties in Stille and sulfoxidation reactions
Source: Royal Society of Chemistry journal article supplement (doi:10.1039/d1ra00734c), 2021-01-01

## **Preparation of Ni-microsphere and Cu-MOF using aspartic acid as coordinating ligand and study of their catalytic properties in Stille and sulfoxidation reactions**

Arash Ghorbani-Choghamarani,<sup>a\*</sup> Hosna Bastan,<sup>b</sup> Zahra Kakakhani,<sup>b</sup> Zahra Taherinia<sup>b</sup>

<sup>a</sup> Department of Organic Chemistry, Faculty of Chemistry, Bu-Ali Sina University, Hamedan 6517838683, Tel: +988138282807, Fax: +988138380709, Iran; E-mail: arashghch58@yahoo.com or a.ghorbani@basu.ac.ir. <sup>b</sup> Department of Chemistry, Ilam University, and P.O. Box 69315516, Ilam, Iran.

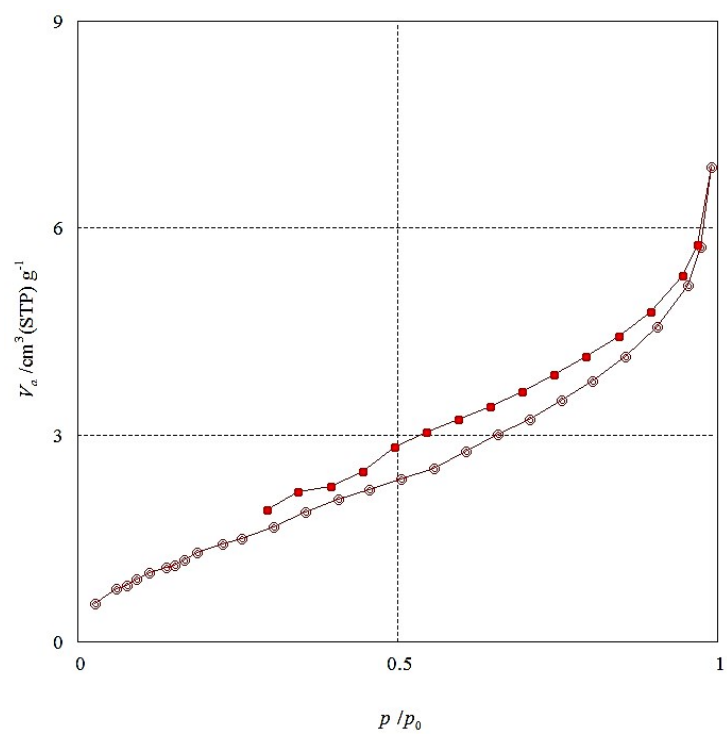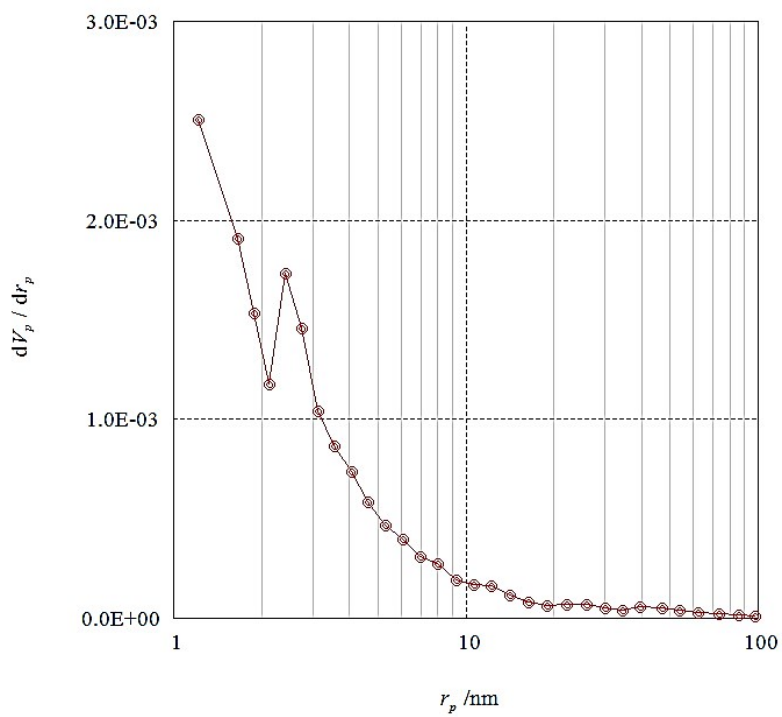

**Figure S1.** The N<sub>2</sub> gas adsorption isotherms and micropore size distribution of Ni microspheres

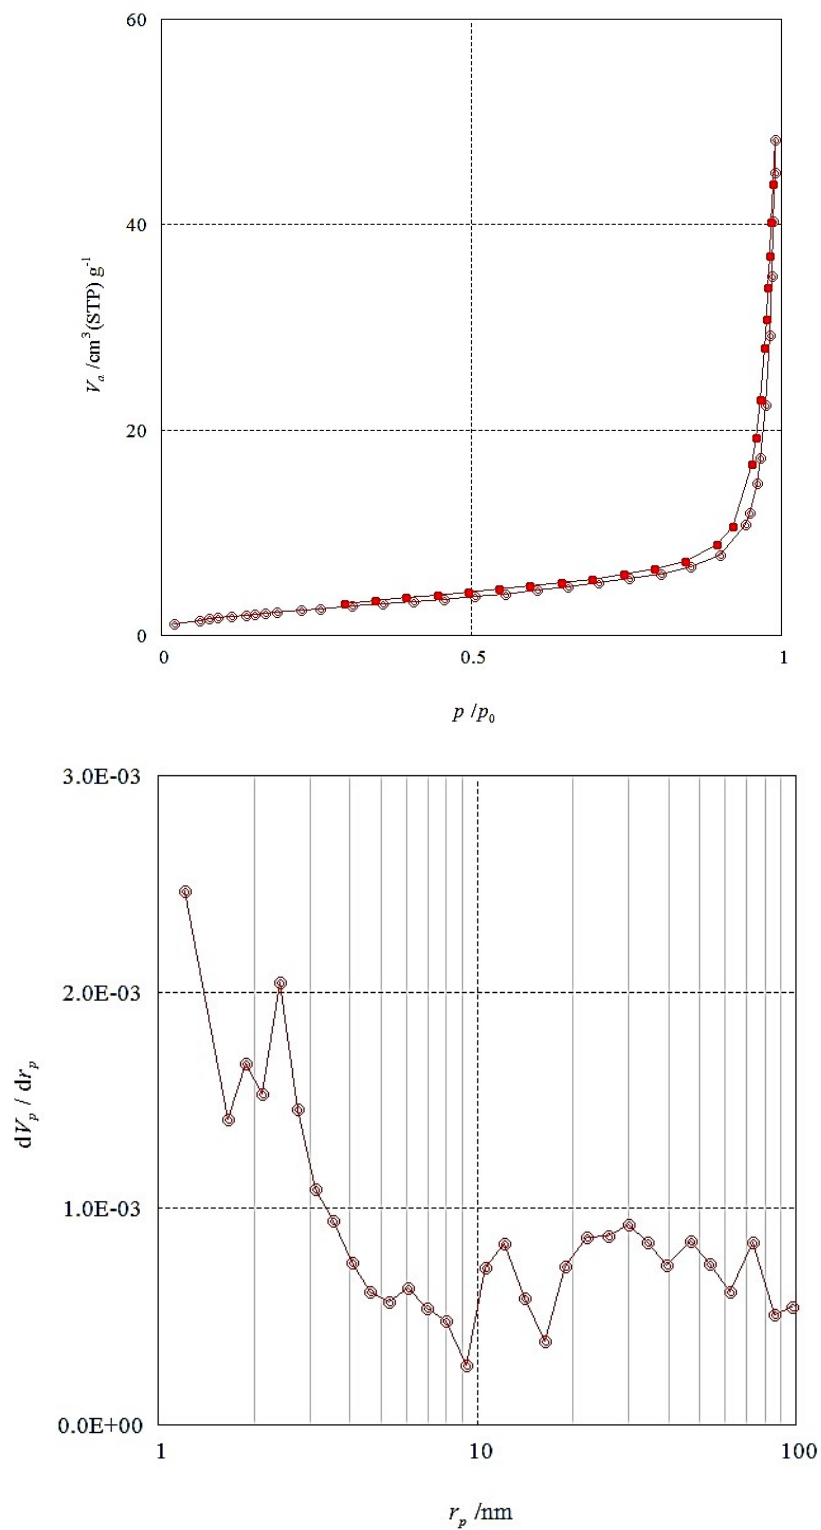

**Figure S2.** The  $\text{N}_2$  gas adsorption isotherms and micropore size distribution of Cu-MOF

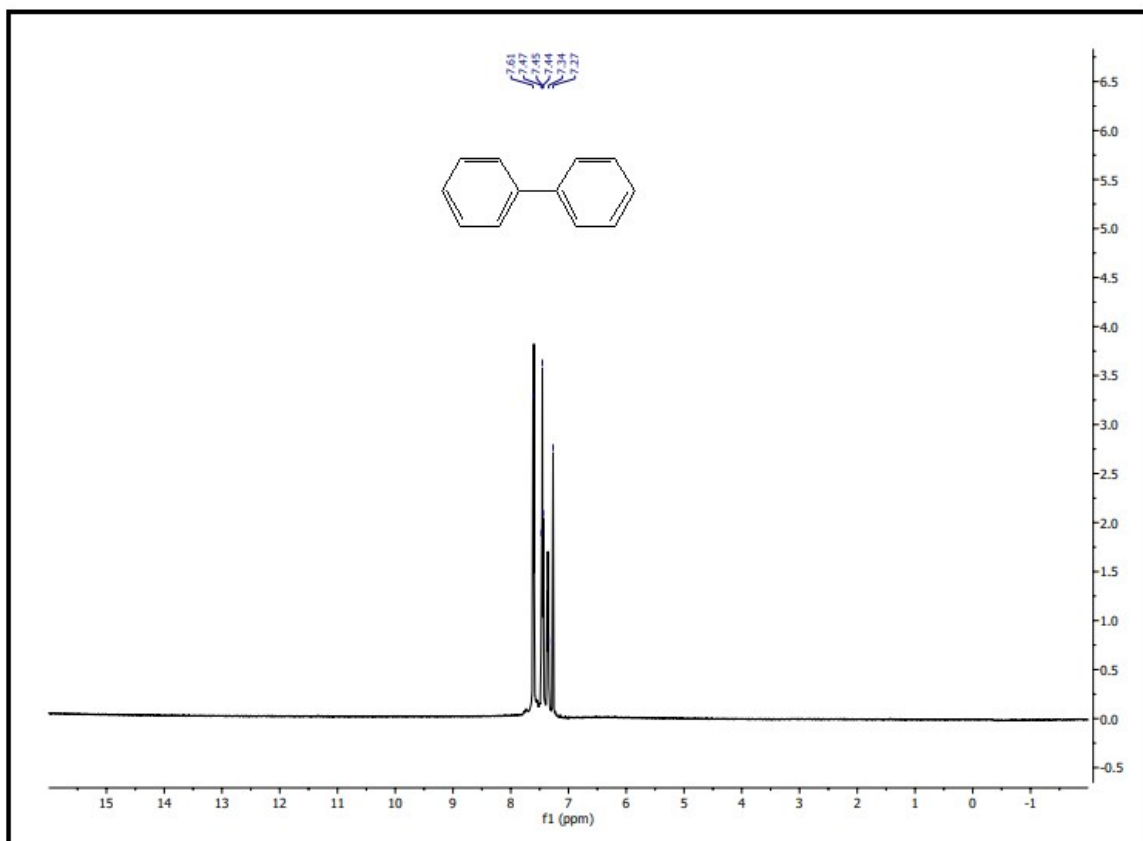

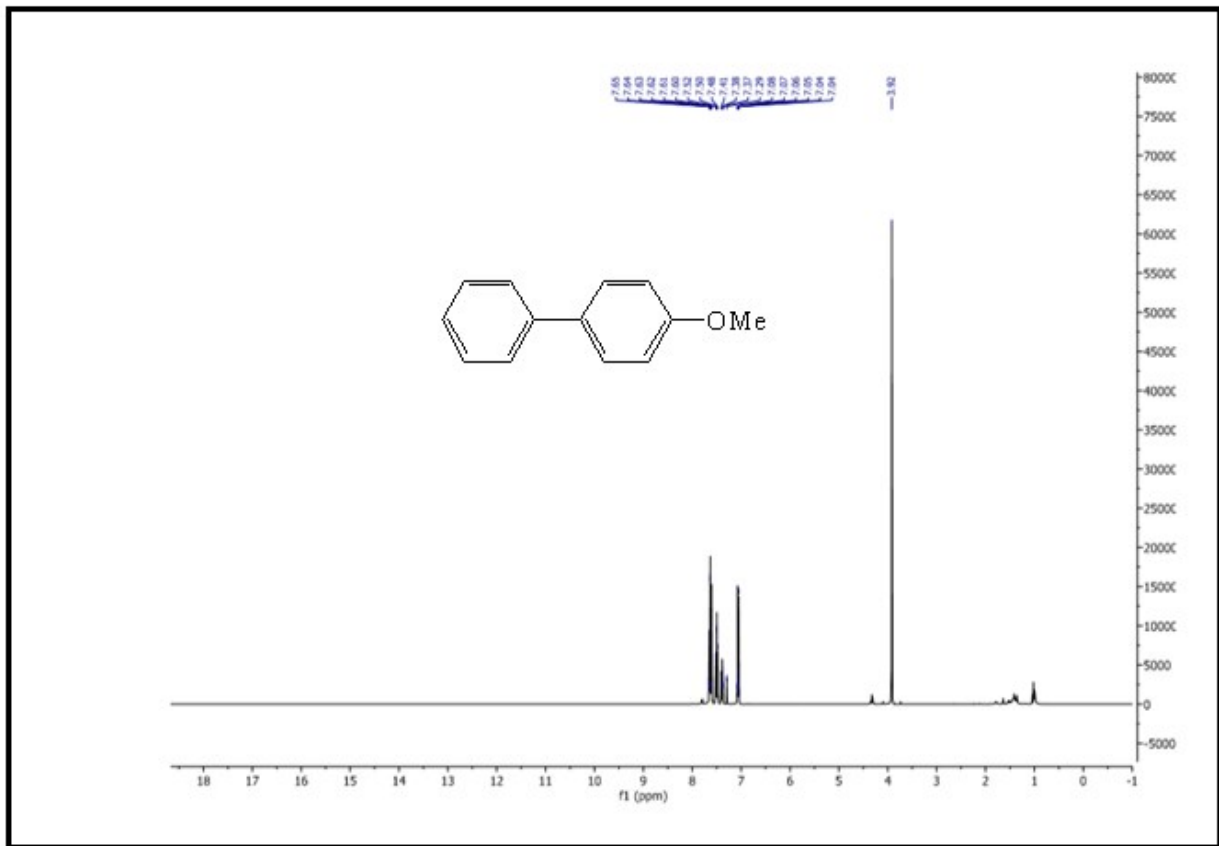

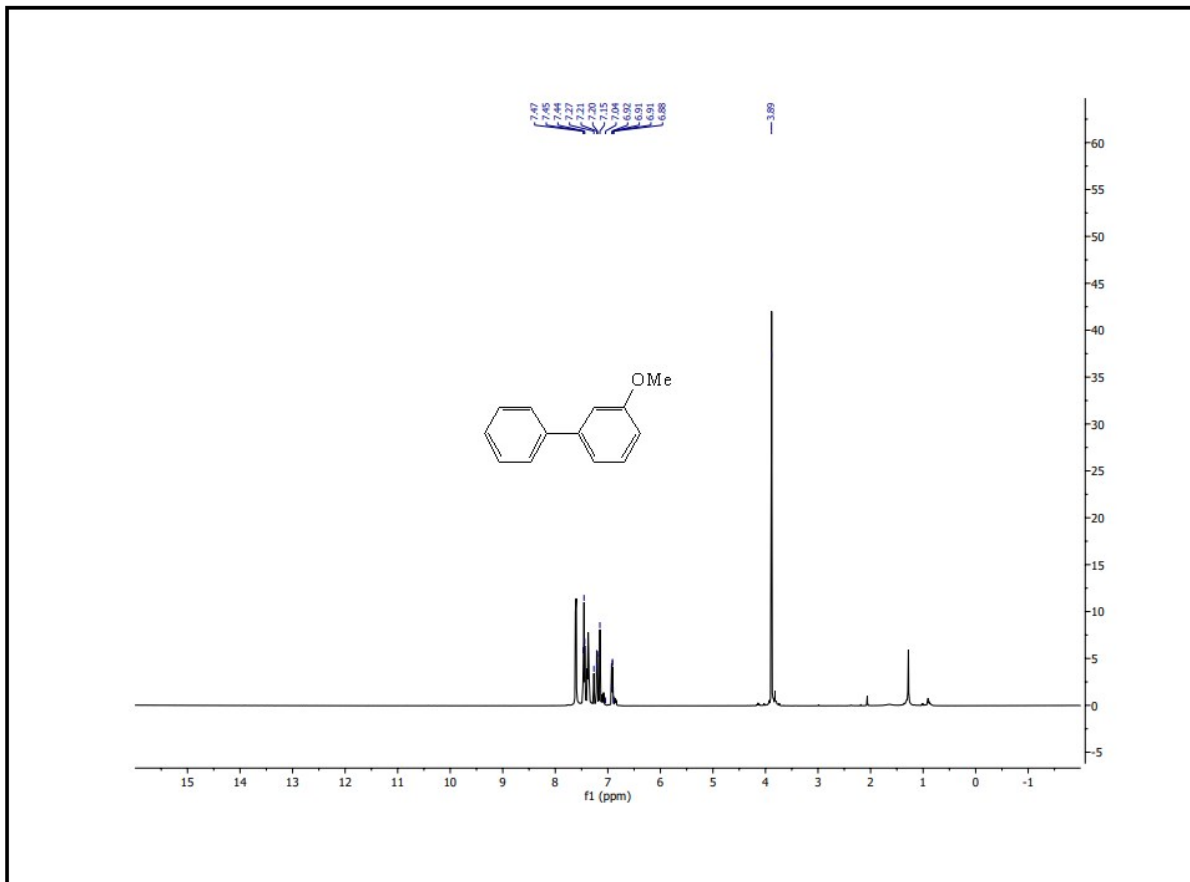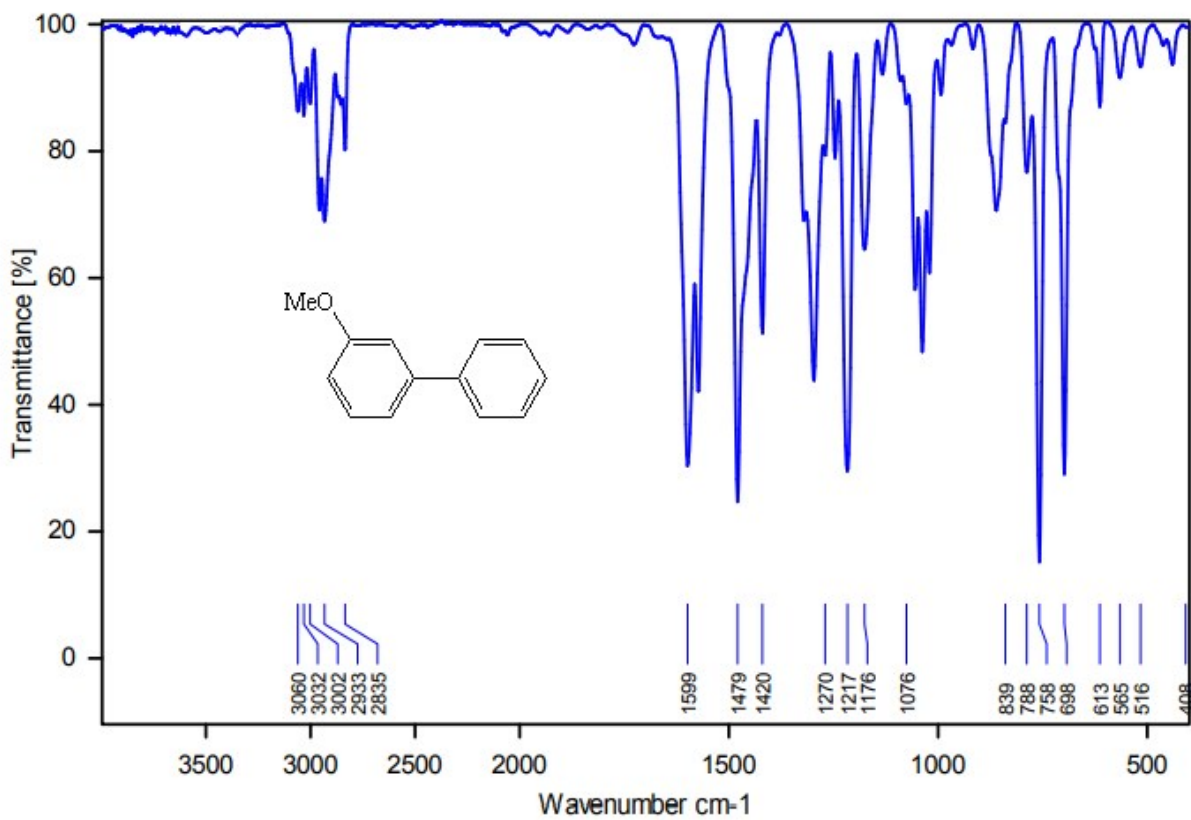

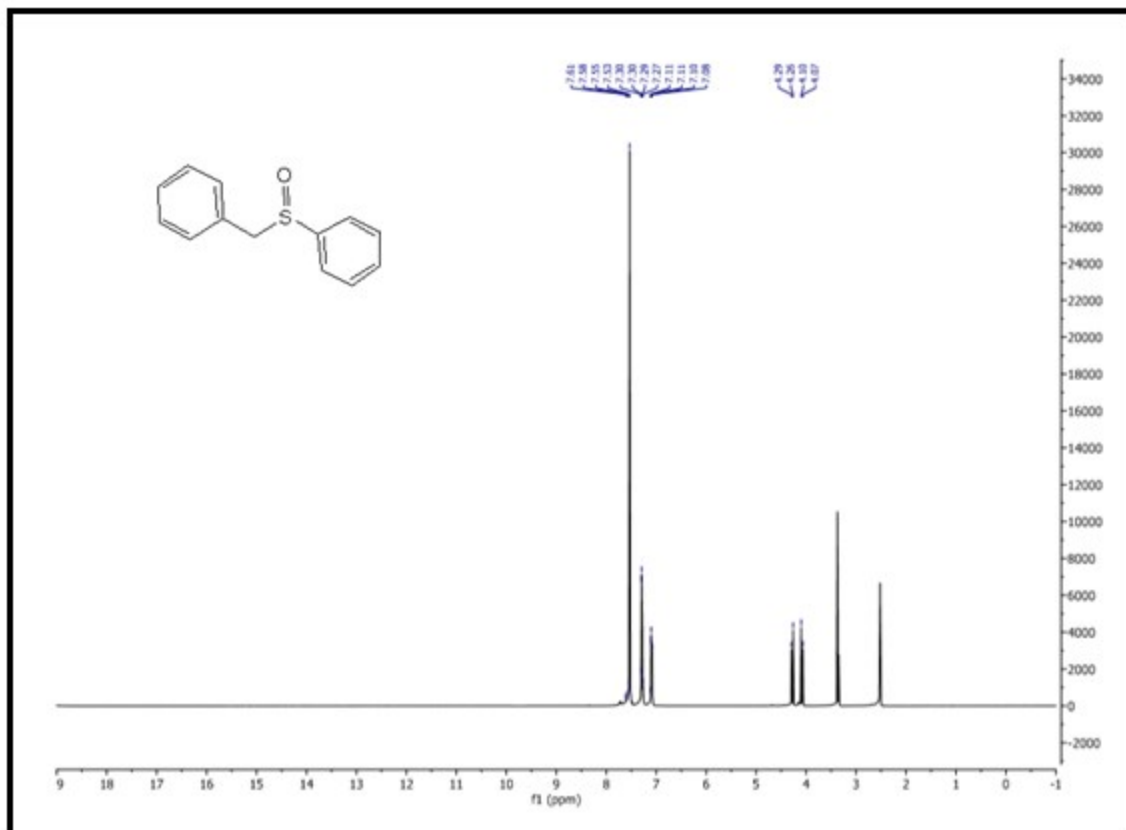

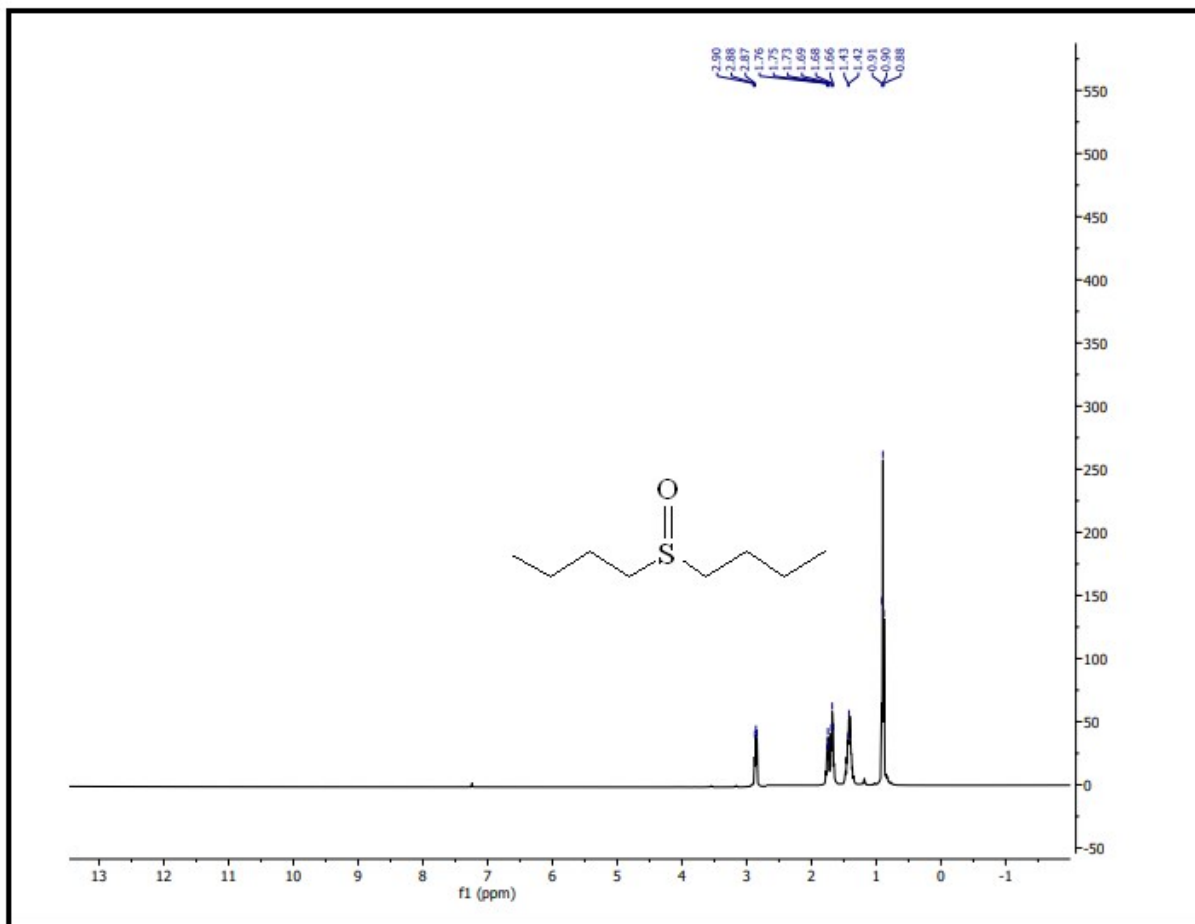



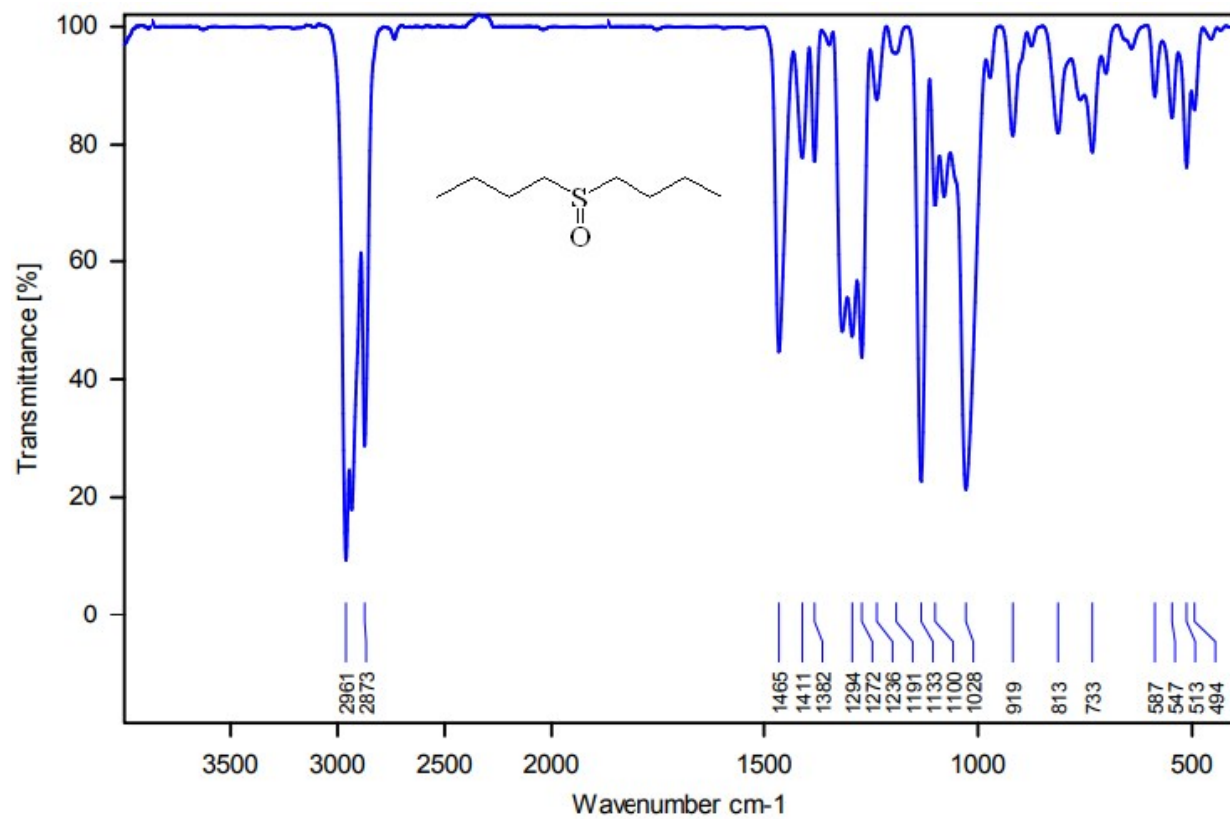

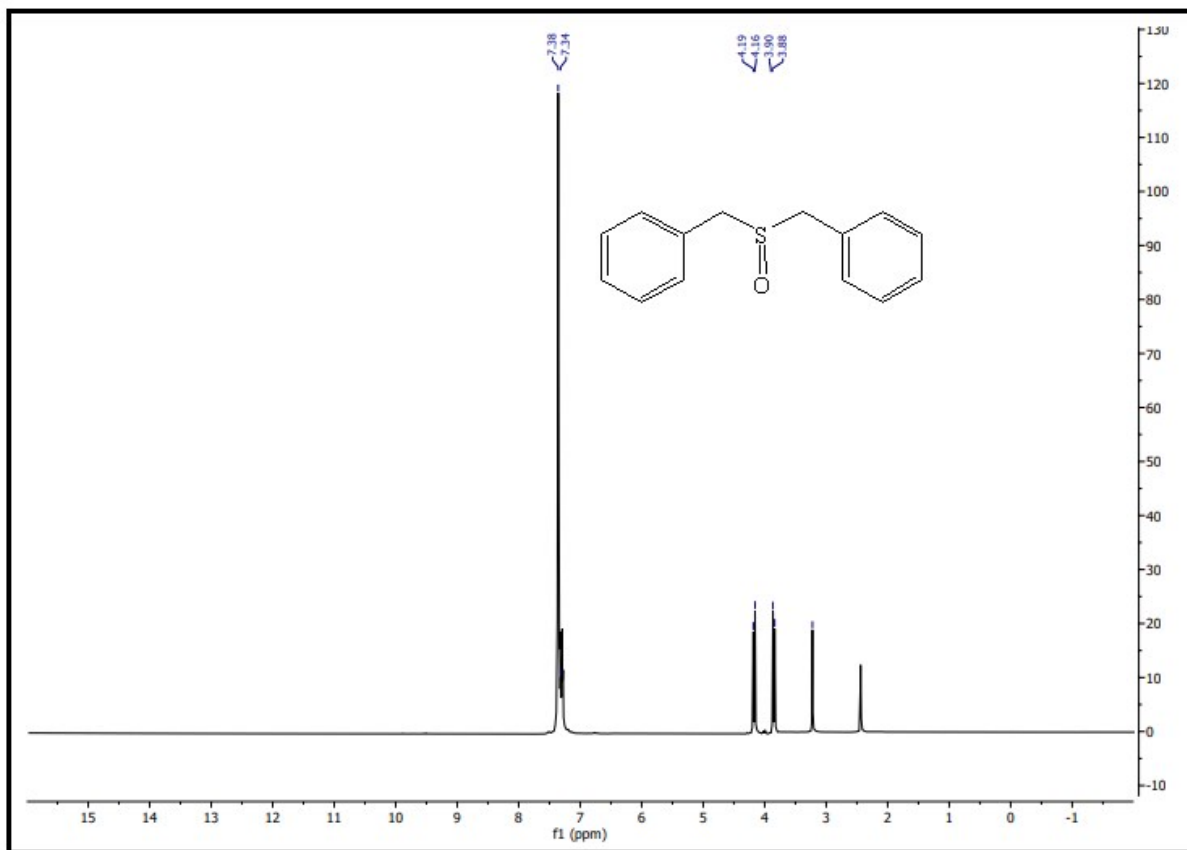

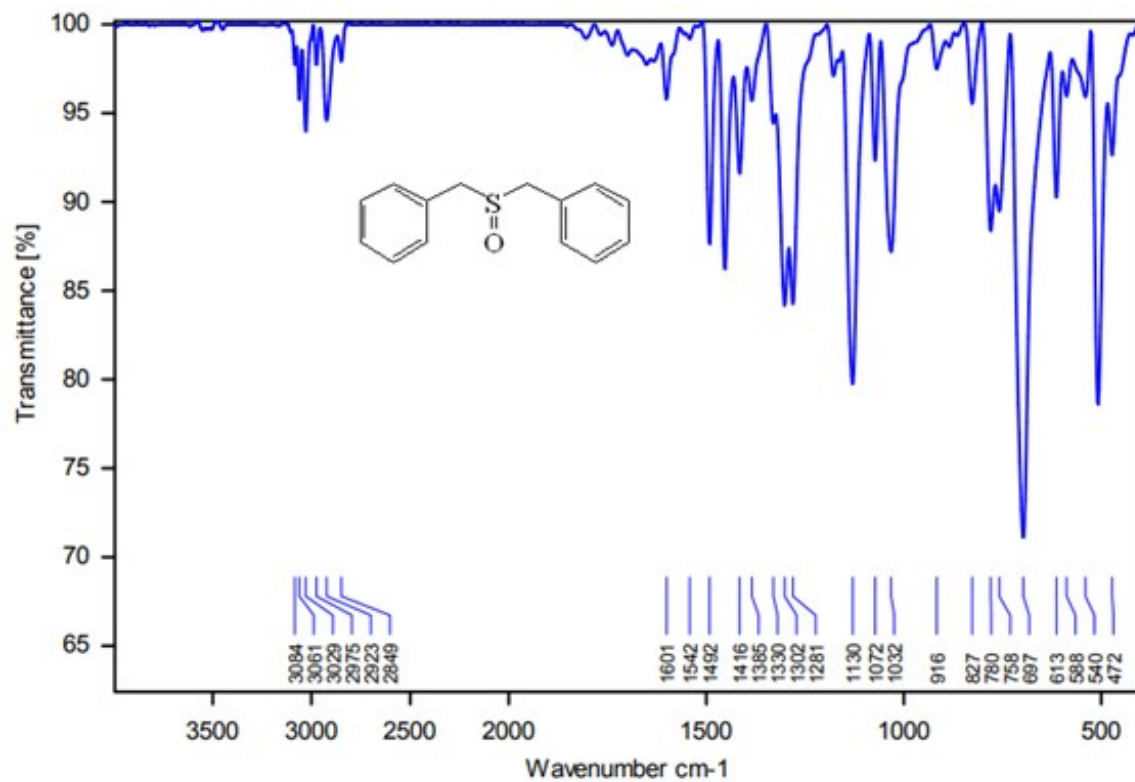

Supplement: d1ra00734c1.pdf [file d1ra00734c1.pdf]
